# Supplementary material for: Molecular structure effects on the mechanisms of corrosion protection of model epoxy coatings on metals
Source: Royal Society of Chemistry journal article supplement (doi:10.1039/d2qm01045c), 2022-12-07
Supplement: d2qm01045c1.pdf [file d2qm01045c1.pdf]

1

2

3

4

5

6

7

*Supporting information*

8

9     **Molecular structure effects on the mechanisms of corrosion protection of**  
10            **model epoxy coatings on metals**

11     Yosra Kotb<sup>1</sup>, Christopher M. Serfass<sup>1</sup>, Alain Cagnard<sup>2</sup>, Katelyn R. Houston<sup>2</sup>, Saad A. Khan<sup>1</sup>,  
12            Lilian C. Hsiao<sup>1</sup>, and Orlin D. Velev<sup>1\*</sup>

13

14     <sup>1</sup>*Department of Chemical and Biomolecular Engineering, North Carolina State University, Raleigh, NC 26795, USA*

15     <sup>2</sup>*Eastman Chemical Company, Kingsport, TN 37660, USA*

16

17 *Confocal imaging*

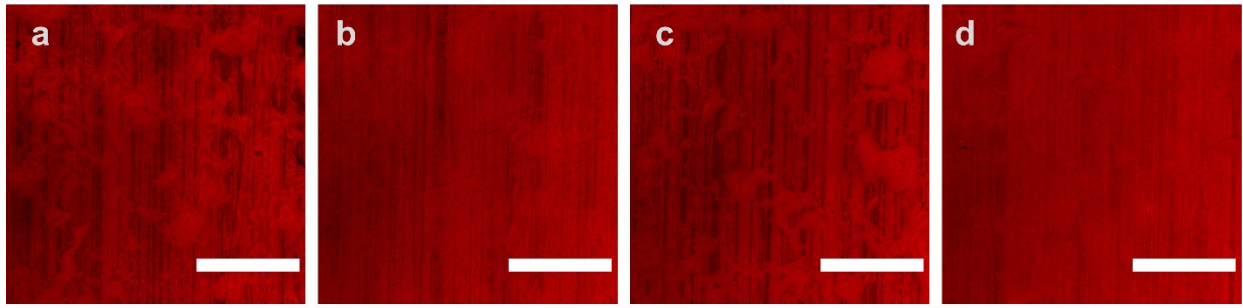

18  
19 **Fig. S1.** Confocal xy projections of type 9 coatings on (a) T23 and (b) TFS, and type 7 coatings  
20 on (c) T23 and (d) TFS after 1 hr of degradation showing no obvious defect sites across the coating  
21 surface.

22 *EDX analysis*

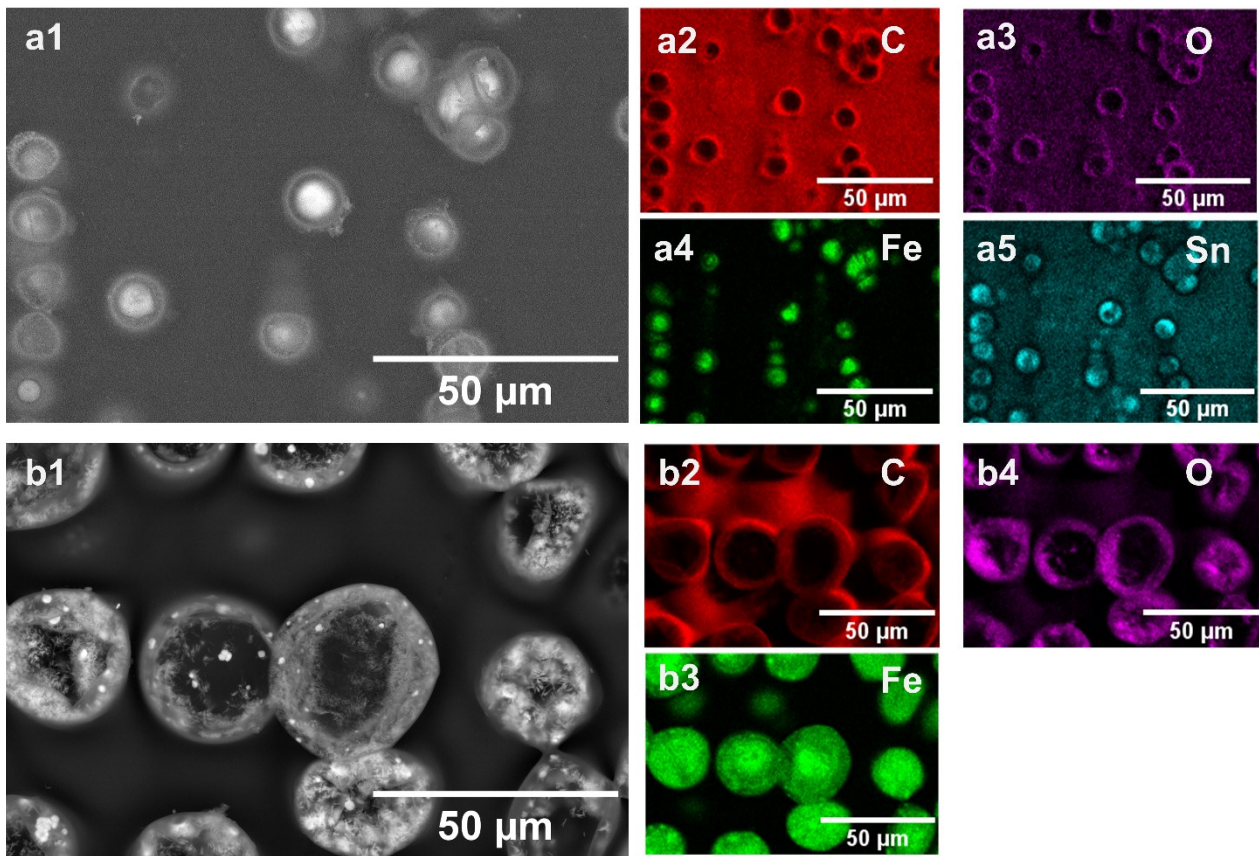

23  
24 **Fig. S2.** Backscattered SEM micrographs and corresponding elemental mapping of type 7 coatings  
25 after 24 hrs of immersion on (a1-a5) T23 and (b1-b4) TFS.

26

27

28

29 **XPS analysis**

30 Chemical analysis of the bare substrates was done using a SPECS X-ray photoelectron  
 31 spectroscopy (XPS) system with a PHOIBOS 150 analyzer. Spectra were generated using an Al  
 32 Ka X- ray source operated at 400 W. The deconvolution of the Cr 2p peak showed four  
 33 components: metallic Cr at 574.3 eV, Cr<sub>2</sub>O<sub>3</sub> at 576.5 eV, Cr(OH)<sub>3</sub> at 577.3 eV, and CrO<sub>3</sub> at 578.9  
 34 eV. For all analyses, data reduction and fitting were carried out using CasaXPS software.

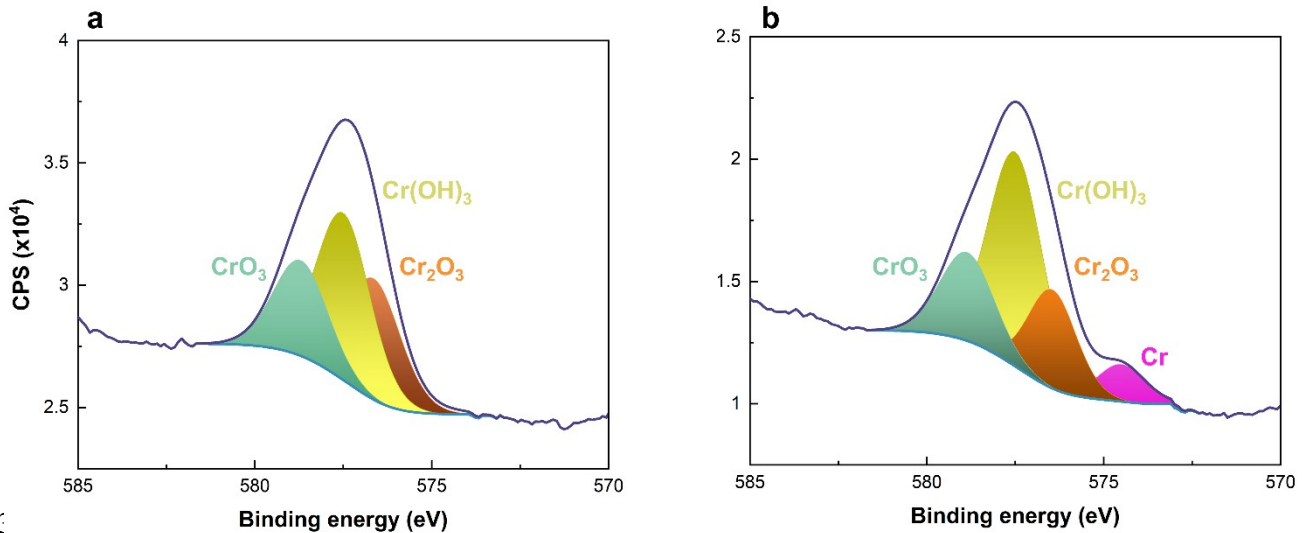

36 **Fig. S3.** High resolution deconvoluted XPS spectra of the Cr 2p peak on bare (a) T23 and (b)TFS.

37

38 **Electrochemical impedance spectroscopy**

39 **Estimation of electrolyte uptake of coatings**

40 The electrolyte uptake of the coatings throughout the exposure time was estimated using the  
 41 Brasher-Kingsbury relationship (eq. S1) to analyze the barrier properties differences between the  
 42 coatings.

$$43 \quad \chi_v = \frac{100 * \log \frac{C(t)}{C(t=0)}}{\log \epsilon_w} \quad \text{eq. S1}$$

44 where  $\chi_v$  is the water volume fraction, C(t) and C(t=0) are the coating capacitances at time t and  
 45 time 0 respectively, and  $\epsilon_w$  is the water permittivity (69.3 at 65°C). Coating capacitance C in  
 46 parallel with coating resistance is computed from the CPE elements (Y0 & n) as follows: C=

$$47 \quad \frac{(Y_0 * R)^{n-1}}{R}$$

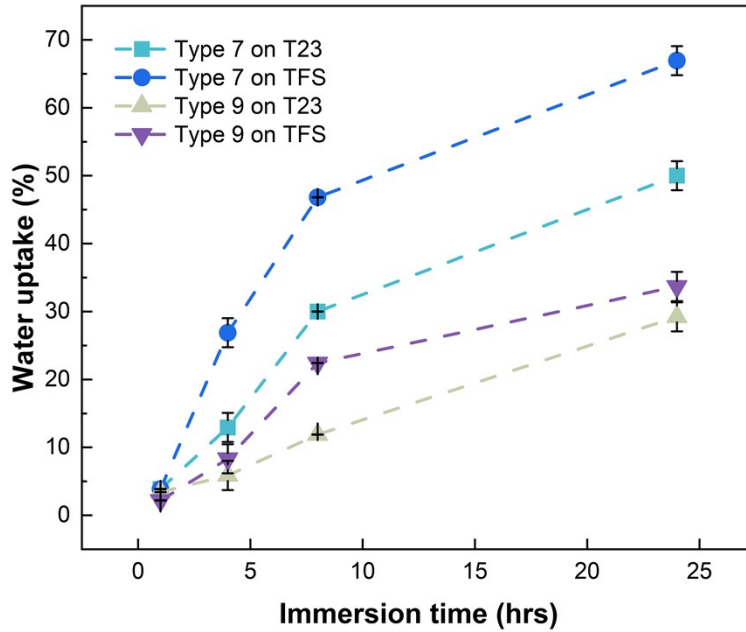

48

49 **Fig. S4.** Volumetric water uptake for types 7 and 9 coatings on T23 and TFS throughout the  
 50 immersion time using the Brasher Kingsbury relationship.

51

52 **EIS spectra of bare T23 and TFS**

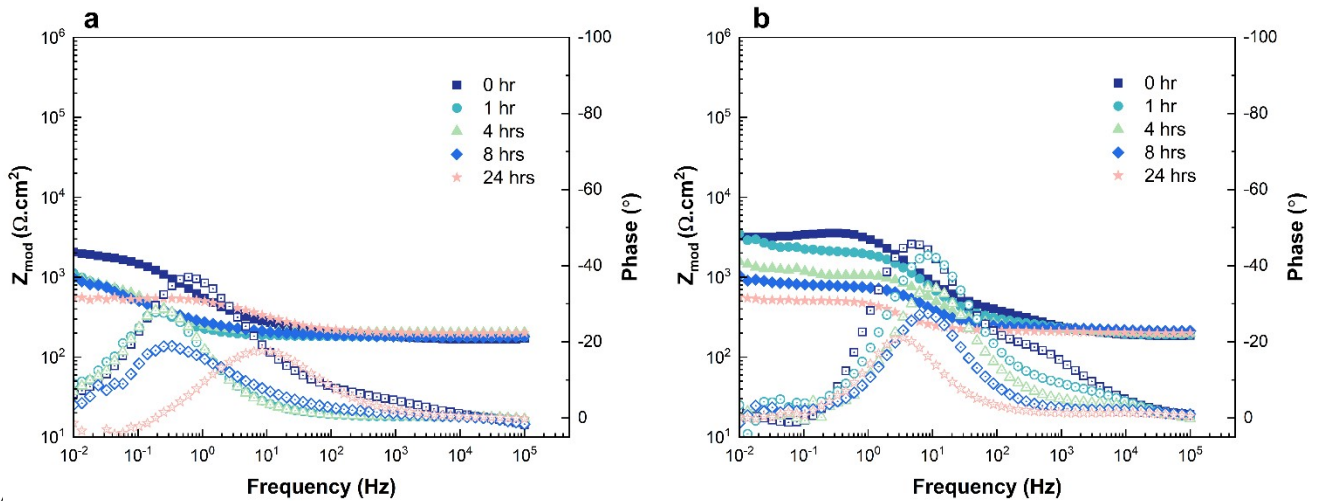

53

54 **Fig. S5.** EIS spectra at different times of degradation of bare (a) T23 and (b) TFS.

55

56

57

58 **Table S1.** EIS fitting results of type 7 coatings on T23 and TFS during exposure to 5% acetic acid  
 59

| <b>T23</b>       |                                                      |                                                                           |                              |                                                                         |                            |                                                     |
|------------------|------------------------------------------------------|---------------------------------------------------------------------------|------------------------------|-------------------------------------------------------------------------|----------------------------|-----------------------------------------------------|
| <b>TFS</b>       |                                                      |                                                                           |                              |                                                                         |                            |                                                     |
| <b>Time (hr)</b> | <b>R<sub>coat</sub></b><br><b>(Ω.cm<sup>2</sup>)</b> | <b>CPE<sub>coat, Y0</sub></b><br><b>(S.s<sup>n</sup>.cm<sup>-2</sup>)</b> | <b>CPE<sub>coat, n</sub></b> | <b>CPE<sub>dl, Y0</sub></b><br><b>(S.s<sup>n</sup>.cm<sup>-2</sup>)</b> | <b>CPE<sub>dl, n</sub></b> | <b>R<sub>pol</sub></b><br><b>(Ω.cm<sup>2</sup>)</b> |
| <b>0</b>         | 2.17E+08<br>2.29E+08                                 | 1.102E-09<br>8.41E-10                                                     | 0.9759<br>0.9849             | -                                                                       | -                          | -                                                   |
| <b>1</b>         | 1.81E+07<br>1.54E+07                                 | 8.72E-10<br>1.04E-09                                                      | 0.9821<br>0.9687             | -                                                                       | -                          | -                                                   |
| <b>4</b>         | 2.99E+05<br>9.14E+05                                 | 9.82E-10<br>1.22E-09                                                      | 0.9762<br>0.9763             | 2.26E-07<br>2.24E-07                                                    | 0.8205<br>0.7633           | 4.85E+06<br>1.26E+06                                |
| <b>8</b>         | 2.70E+05<br>1.01E+05                                 | 1.14E-09<br>1.68E-08                                                      | 0.9675<br>0.9128             | 3.12E-07<br>7.80E-06                                                    | 0.7745<br>0.7824           | 1.64E+06<br>5.95E+05                                |
| <b>24</b>        | 4.60E+03<br>1.38E+03                                 | 1.44E-08<br>1.57E-05                                                      | 0.8217<br>0.3897             | 1.85E-06<br>1.03E-04                                                    | 0.8442<br>0.7829           | 1.04E+05<br>3.92E+03                                |

60

61 **Table S2.** EIS fitting results of type 9 coatings on T23 and TFS during exposure to 5% acetic acid

| <b>T23</b>       |                                                      |                                                                           |                              |                                                                         |                            |                                                     |
|------------------|------------------------------------------------------|---------------------------------------------------------------------------|------------------------------|-------------------------------------------------------------------------|----------------------------|-----------------------------------------------------|
| <b>TFS</b>       |                                                      |                                                                           |                              |                                                                         |                            |                                                     |
| <b>Time (hr)</b> | <b>R<sub>coat</sub></b><br><b>(Ω.cm<sup>2</sup>)</b> | <b>CPE<sub>coat, Y0</sub></b><br><b>(S.s<sup>n</sup>.cm<sup>-2</sup>)</b> | <b>CPE<sub>coat, n</sub></b> | <b>CPE<sub>dl, Y0</sub></b><br><b>(S.s<sup>n</sup>.cm<sup>-2</sup>)</b> | <b>CPE<sub>dl, n</sub></b> | <b>R<sub>pol</sub></b><br><b>(Ω.cm<sup>2</sup>)</b> |
| <b>0</b>         | 2.33E+09<br>5.51E+08                                 | 6.73E-10<br>2.85E-10                                                      | 0.9775<br>0.9876             | -                                                                       | -                          | -                                                   |
| <b>1</b>         | 5.21E+08<br>2.11E+08                                 | 7.66E-10<br>3.88E-10                                                      | 0.9719<br>0.9726             | -                                                                       | -                          | -                                                   |
| <b>4</b>         | 4.20E+07<br>2.04E+07                                 | 7.99E-10<br>3.635E-10                                                     | 0.9731<br>0.982              | 5.29E-09<br>8.209E-10                                                   | 0.5576<br>0.8044           | 2.39E+08<br>4.60E+07                                |
| <b>8</b>         | 3.67E+06<br>1.17E+06                                 | 8.21E-10<br>3.81E-10                                                      | 0.9695<br>0.9782             | 3.36E-08<br>1.13E-08                                                    | 0.5698<br>0.8267           | 2.65E+07<br>7.30E+06                                |
| <b>24</b>        | 8.22E+04<br>9.99E+04                                 | 4.15E-09<br>8.58E-10                                                      | 0.8838<br>0.9329             | 1.66E-06<br>4.95E-07                                                    | 0.4734<br>0.7414           | 3.55E+05<br>2.14E+05                                |

62

63 **Rubber elasticity theory for calculating crosslink density:**

64 According to this theory, the storage modulus ( $E'$ ) in the rubbery region ( $T_g+40^\circ\text{C}$ ) will change with  
 65 crosslink density ( $\nu_e$ ) as follows:

66 
$$\nu_e = \frac{E'}{3RT}$$

eq. S2

67 where R is the universal gas constant, T is the absolute temperature in K, and  $u_e$  is the crosslink density  
68 in mol.m<sup>-3</sup>

69 **Toughness modulus calculation**

70 
$$U_T = \int_0^{\varepsilon_f} \sigma d\varepsilon$$

eq. S3

71 where  $\sigma$  is the tensile strength and  $\varepsilon$  is the tensile strain.

72

73
